# Supplementary material
Source: PubMed Central journal article supplement (PMC4568835)

**Supplementary Figure 2.** Family B. Chromatograms of the *C9ORF72* GGGGCC hexanucleotide repeat expansions and of part of exon 6 of *TARDBP* showing c.1144G>A (p.A382T) mutations.

Refer to Figure 1 for the designation of the patients.

Family B, patient II-1, *C9ORF72*

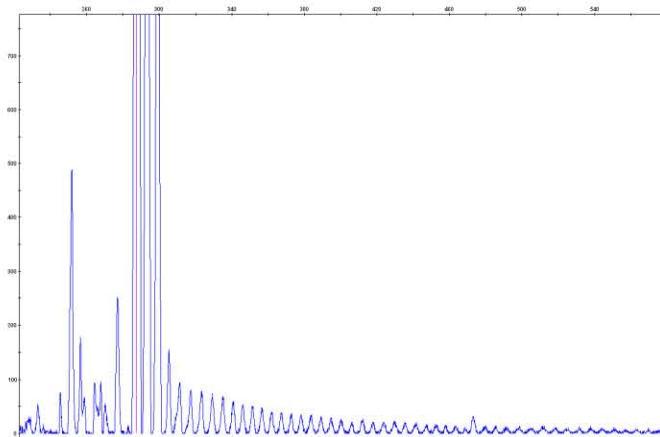

Family B, patient II-1, *TARDBP*

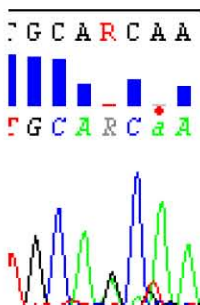

Supplement: NIHMS719962-supplement-4.pdf [file NIHMS719962-supplement-4.pdf]
